# Supplementary material for: Endogenous overexpression of an active phosphorylated form of DNA polymerase β under oxidative stress in Trypanosoma cruzi
Source: PLoS Negl Trop Dis. 2018 Feb 12;12(2):e0006220. doi: 10.1371/journal.pntd.0006220 (PMC5825160; doi:10.1371/journal.pntd.0006220)
Supplement: S1 Data — (XLSX) [file pntd.0006220.s001.xlsx]

## Sheet: Dataset Fig.1B
K DNA EPIMASTIGOTE		Control			H2O2
	Input	100	100	100	100	100	100
	IgG IP	10.8703	3.80231	7	5.33054	2.94718	4
	Pol B IP	128.205	107.409	121	121.687	102.616	114
S DNA EPIMASTIGOTE		Control			H2O2
	Input	100	100	100	100	100	100
	IgG IP	10.4681	5.73378	8	10.7726	8.07158	7
	Pol B IP	10.1869	4.90465	5	10.2805	2.73732	4
K DNA TRYPOMASTIGOTE		Control			H2O2
	Input	100	100	100	100	100	100
	IgG IP	4.20054	4.47261	3	5.01382	4.18091	4
	Pol B IP	109.395	133.338	110	102.231	116.285	112
S DNA TRYPOMASTIGOTE		Control			H2O2
	Input	100	100	100	100	100	100
	IgG IP	5.00993	4.39051	5	3.26976	3.00111	3
	Pol B IP	4.3074	4.38456	4	3.47165	2.62071	3

## Sheet: Dataset Fig.2B
		Epimastigote
		Treatment (hours)	H			L
		0	1	1	1	1	1	1
		1	3.64415	2.98371	2.98371	1.3009	0.994568	1.49185
		2	3.24568	3.90892	3.90892	1.1543	0.977229	1.46584
		4	3.56217	4.48312	4.29605	1.53788	2.28931	2.47104
		Trypomastigote
		Treatment (hours)	H			L
		0	1	1	1	1	1	1
		1	1.96968	2.02225	2.02225	1.30355	1.51669	1.01112
		2	3.182	3.06978	2.87792	1.79979	1.63082	1.43896
		4	3.79277	3.07066	4.09422	1.01517	1.02355	1.16035
								1

## Sheet: Dataset Fig. 3D
	Epimastigote Control	Epimastigote H2O2	Trypomastigote Control	Trypomastigote H2O2
	17134	50340	15838	41030
	17000	50000	15000	40000
	17300	49392	15920	42810
	17000	51000	16000	42000

## Sheet: Dataset Fig.4
	EPIMASTIGOTE					EPIMASTIGOTE					EPIMASTIGOTE
		qPCR					RNA					Northern Blot
	Treatment (hours)	0	2	4		Treatment (hours)	0	2	4		Treatment (hours)	0	2	4
		100	23	51			100	130.68	130			100	81.5	87.7
		101	43	58			101	120.231	120			101	74	80
		101	39	60			102	120.253	128			100	80	87
		101	50	75								101	72	83
						TRYPOMASTIGOTE
							qPCR
						Treatment (hours)	0	2	4
							100	ND	90.75
							101	ND	83.5
							101	ND	85
							101	ND	90
